# Supplementary material for: C2 weakens the turnover frequency during the melting of FexCy: insights from reactive MD simulations
Source: Royal Society of Chemistry journal article supplement (doi:10.1039/d1nj05114h), 2021-11-18
Supplement: d1nj05114h1.pdf [file d1nj05114h1.pdf]

## Supplementary Material for

### **C2 weakens turn over frequency during melting of $\text{Fe}_x\text{C}_y$ : insights from reactive MD simulations**

Yubing Liu,<sup>a,b,c</sup> Kuan Lu,<sup>\*b,c</sup> Xingchen Liu,<sup>b,c</sup> Jinjia Liu,<sup>b,c,d</sup> Wen-Ping Guo,<sup>c</sup> Wei Chen,<sup>a</sup> Qing Peng,<sup>e</sup> Yu-Fei Song,<sup>\*a</sup> Yong Yang,<sup>b,c</sup> Yong-Wang Li,<sup>b,c</sup> and Xiao-Dong Wen<sup>\*b,c</sup>

<sup>a</sup>State Key Laboratory of Chemical Resource Engineering, School of Chemistry, Beijing University of Chemical Technology, Beijing 100029, P. R. China

<sup>b</sup>State Key Laboratory of Coal Conversion, Institute of Coal Chemistry, Chinese Academy of Sciences, Taiyuan, Shanxi 030001, P.R. China

<sup>c</sup>National Energy Center for Coal to Clean Fuels, Synfuels China Co., Ltd., Huairou District, Beijing 101400, P. R. China

<sup>d</sup>University of Chinese Academy of Sciences, No. 19A Yuquan Road, Beijing 100049, P. R. China

<sup>e</sup>Physics Department, King Fahd University of Petroleum & Minerals, Dhahran 31261, Saudi Arabia

## Contents

**Fig. S1.** Validation of the Lindemann determination criteria of  $\text{Fe}_x\text{C}_y$  nanoparticles.

**Fig. S2.** The Wulff construction of  $\text{Fe}_x\text{C}_y$ .

**Fig. S3.** Cubic boxes for (a)  $\text{Fe}_x\text{C}_y$  nanoparticle melting and (b) CO activation simulations.

**Table S1.** The melting and pre-melting temperature of  $\text{Fe}_x\text{C}_y$  nanoparticles of various sizes.

**Fig. S4.** Calculated (a) temperature, (b) total energy, and (c) potential energy curve of bulk  $\text{Fe}_5\text{C}_2$ .

**Fig. S5.** Curves of (a) potential energy and (b) density of 5nm  $\text{Fe}_x\text{C}_y$  nanoparticles with temperature.

**Fig. S6.** Individual atom Lindemann index variation from a lower temperature to higher of  $\text{Fe}_5\text{C}_2$  nanoparticles, (a) 2 nm; (b) 3 nm; (c) 5 nm; (d) 8 nm.

**Fig. S7.** Individual atom Lindemann index variation from a lower temperature to higher of 5 nm  $\text{Fe}_2\text{C}$  nanoparticles.

**Fig. S8.** Individual atom Lindemann index variation from a lower temperature to higher of 5 nm  $\text{Fe}_3\text{C}$  nanoparticles.

**Fig. S9.** Individual atom Lindemann index variation from a lower temperature to higher of 5 nm  $\text{Fe}_4\text{C}$  nanoparticles.

**Fig. S10.** The structure of bulk  $\text{Fe}_5\text{C}_2$  and the radial distribution functions obtained for bulk  $\text{Fe}_5\text{C}_2$ .

**Fig. S11.** (a)-(e) The mean-square displacements (MSD) and (f)-(j) the diffusion coefficient of Fe and C atoms of  $\text{Fe}_5\text{C}_2$  nanoparticles at different temperatures.

**Fig. S12.** (a) The CO dissociation number and (b) the TOF value of the nanoparticles with/without C2 models.

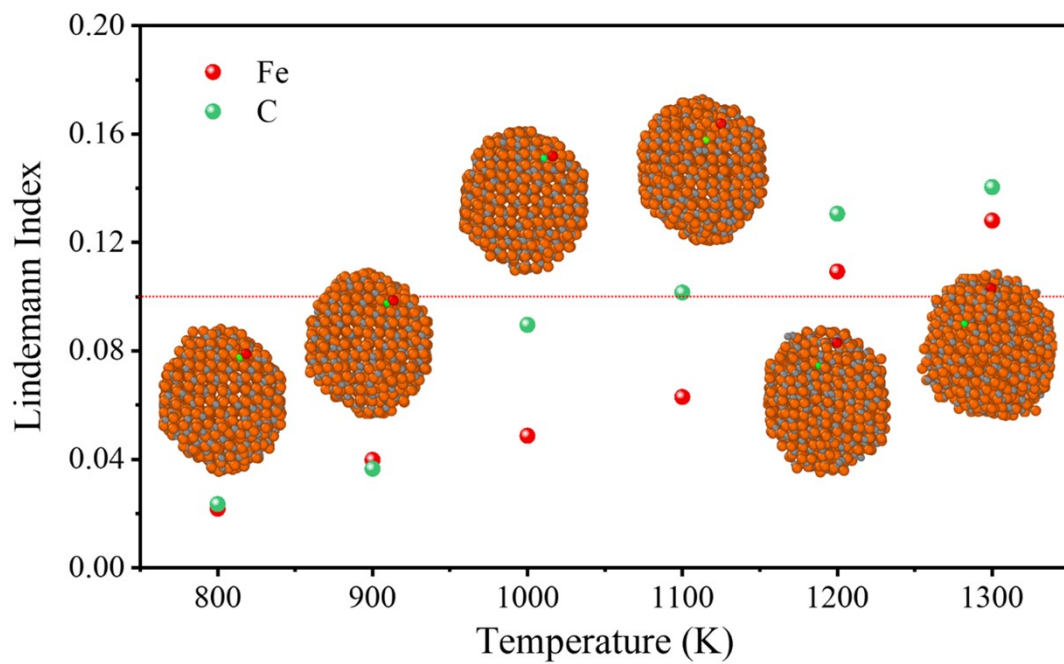

**Fig. S1.** Validation of the Lindemann determination criteria of  $\text{Fe}_x\text{C}_y$  nanoparticles. The figure shows the Lindemann index of the labeled atoms. The atoms are activated and diffuse when their Lindemann index reaches 0.1.

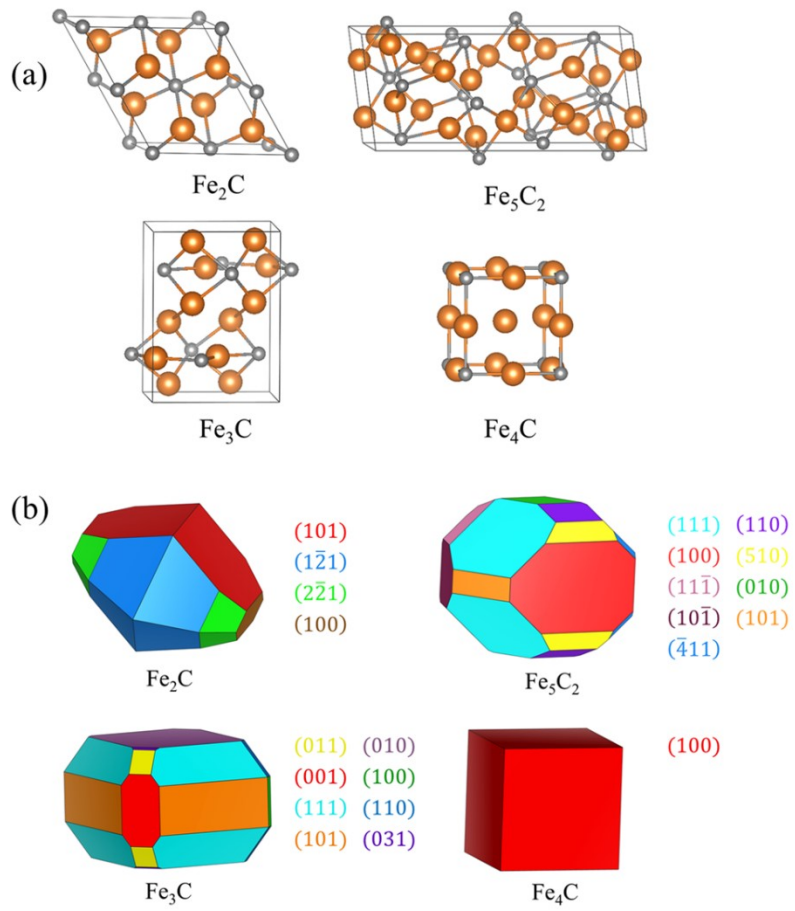

**Fig. S2.** (a) The initial crystal structures of  $\text{Fe}_x\text{C}_y$ ; (b) the Wulff construction of  $\text{Fe}_x\text{C}_y$ .

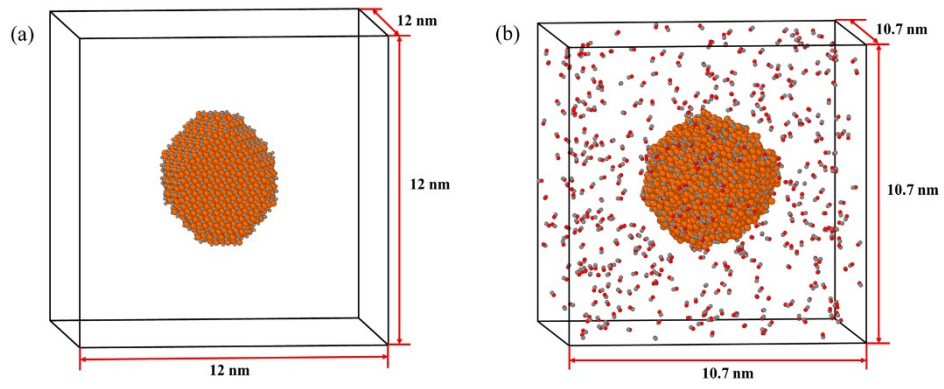

**Fig. S3.** Cubic boxes for (a)  $\text{Fe}_x\text{C}_y$  nanoparticle melting and (b) CO activation simulations.

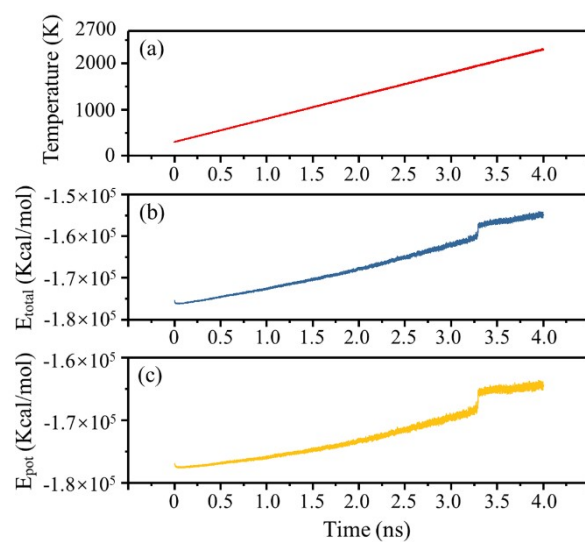

**Fig. S4.** Calculated (a) temperature, (b) total energy, and (c) potential energy curve of bulk  $\text{Fe}_5\text{C}_2$ .

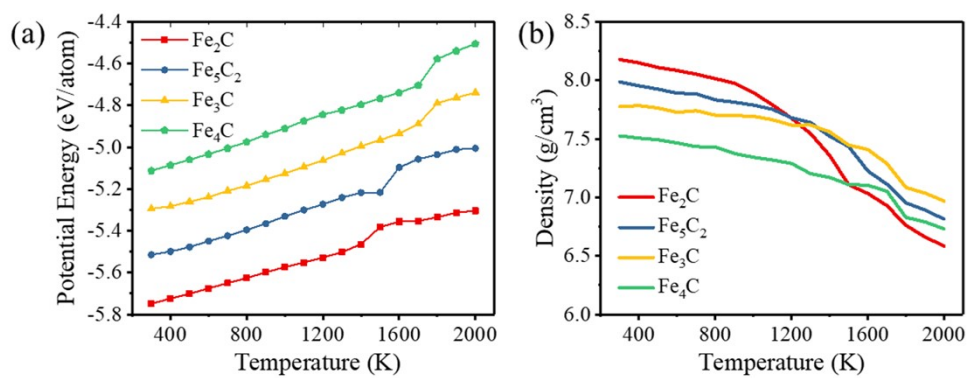

**Fig. S5.** Curves of (a) potential energy and (b) density of 5nm  $\text{Fe}_x\text{C}_y$  nanoparticles with temperature.

**Table S1.** The melting and pre-melting temperature (K) of Fe<sub>x</sub>C<sub>y</sub> nanoparticles of various sizes.

|                                | Melting Temperature |      |      |      | Pre-melting Temperature |      |      |      |
|--------------------------------|---------------------|------|------|------|-------------------------|------|------|------|
|                                | 2 nm                | 3 nm | 5 nm | 8 nm | 2 nm                    | 3 nm | 5 nm | 8 nm |
| Fe <sub>2</sub> C              | 1030                | 1275 | 1420 | 1550 | 850                     | 1100 | 1210 | 1350 |
| Fe <sub>5</sub> C <sub>2</sub> | 1125                | 1380 | 1570 | 1700 | 850                     | 1075 | 1195 | 1320 |
| Fe <sub>3</sub> C              | 1050                | 1520 | 1750 | 1875 | 800                     | 1000 | 1095 | 1300 |
| Fe <sub>4</sub> C              | 950                 | 1450 | 1780 | 1950 | 700                     | 850  | 980  | 1200 |



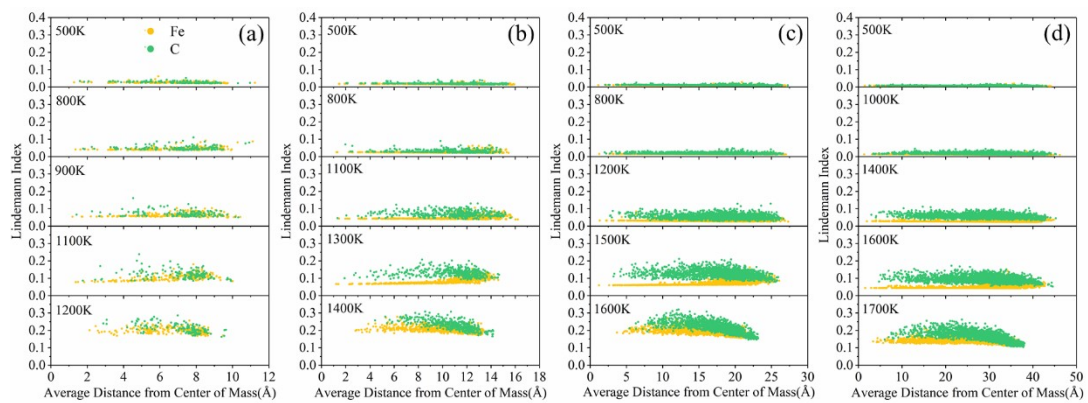

**Fig. S6.** Individual atom Lindemann index variation from a lower temperature to higher of  $\text{Fe}_5\text{C}_2$  nanoparticles, (a) 2 nm; (b) 3 nm; (c) 5 nm; (d) 8 nm.

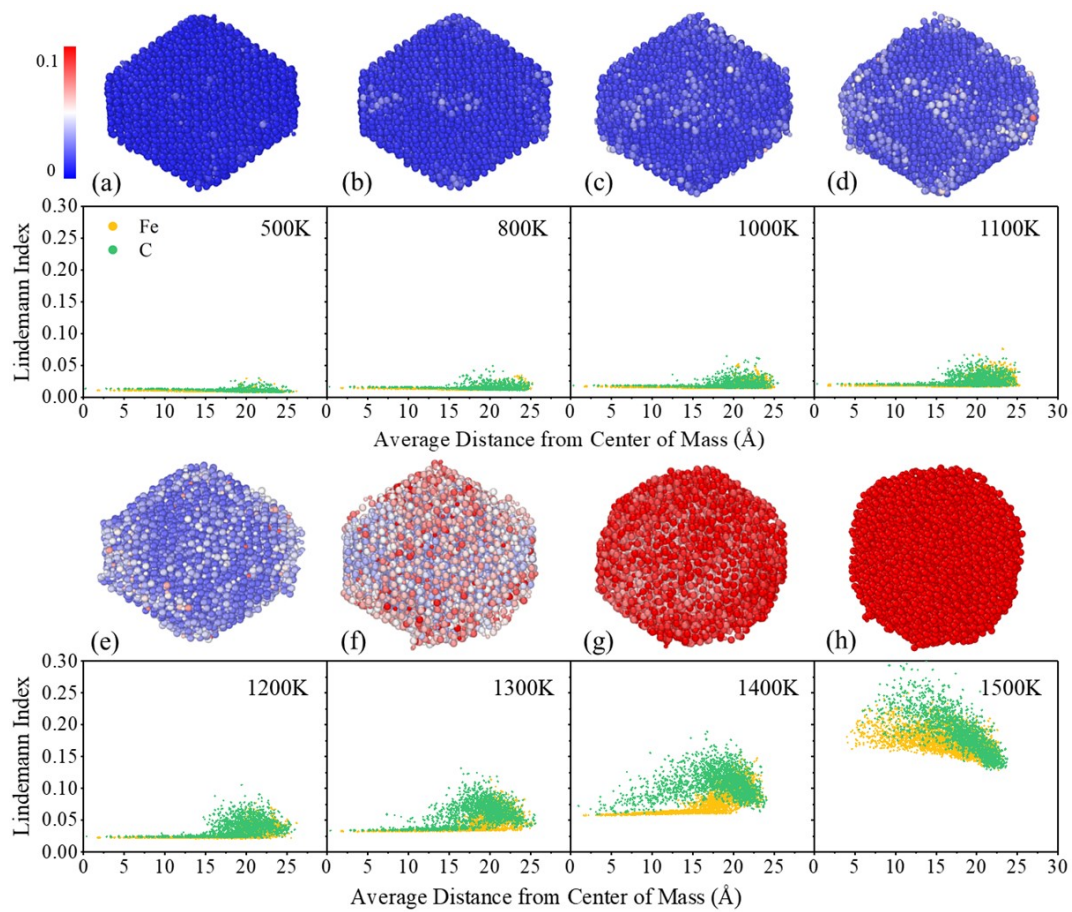

**Fig. S7.** Individual atom Lindemann index variation from a lower temperature to higher of 5nm Fe<sub>2</sub>C nanoparticles.

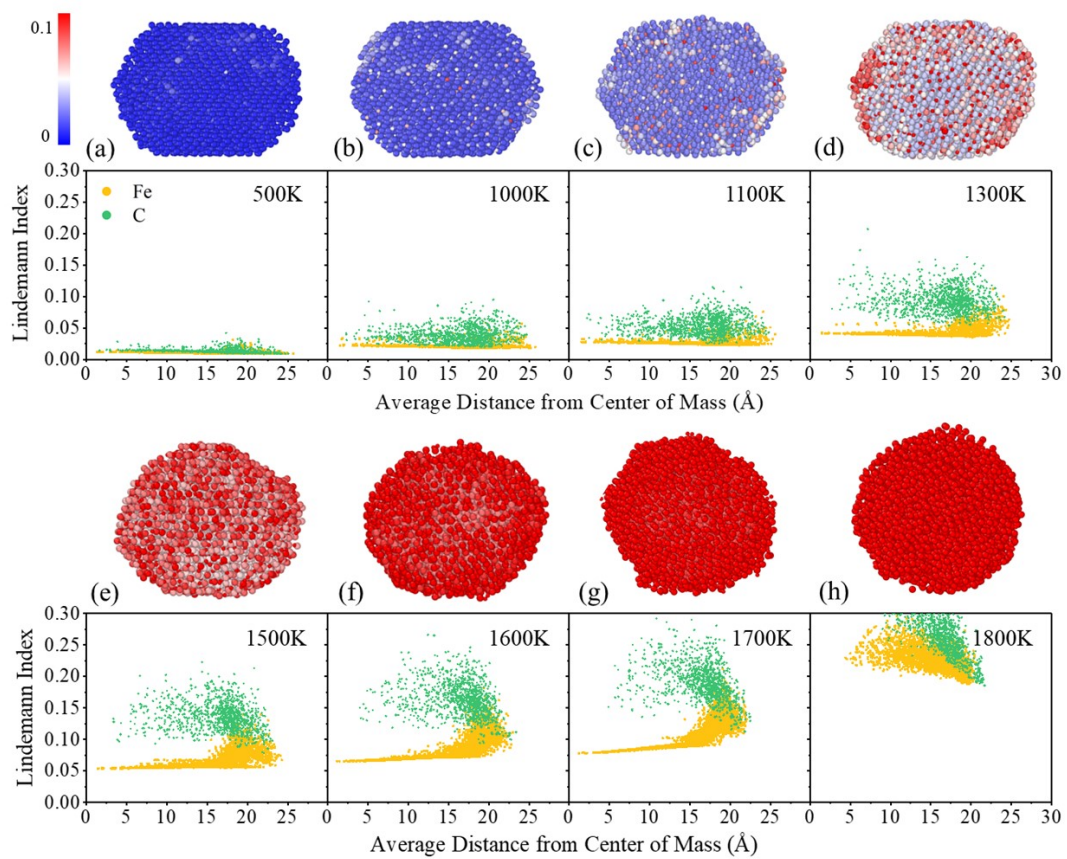

**Fig. S8.** Individual atom Lindemann index variation from a lower temperature to higher of 5 nm  $\text{Fe}_3\text{C}$  nanoparticles.

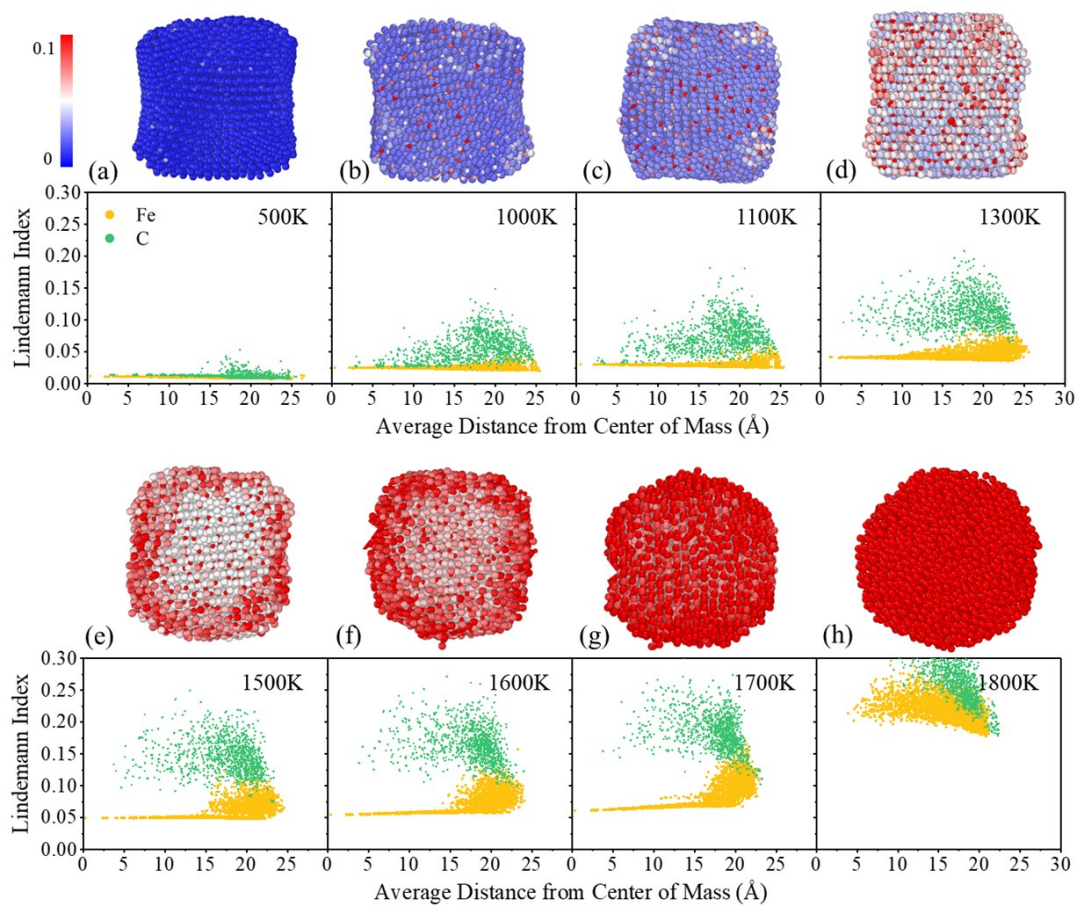

**Fig. S9.** Individual atom Lindemann index variation from a lower temperature to higher of 5 nm  $\text{Fe}_4\text{C}$  nanoparticles.

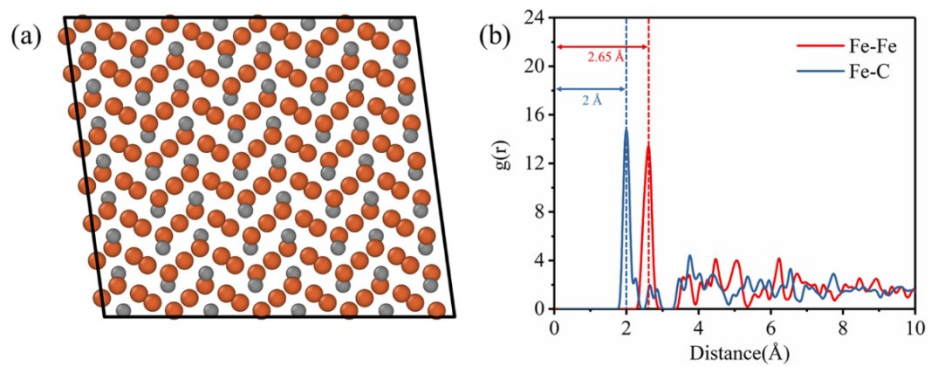

**Fig. S10.** (a) The structure of bulk  $\text{Fe}_5\text{C}_2$ ; (b) Radial distribution functions obtained for bulk  $\text{Fe}_5\text{C}_2$ .

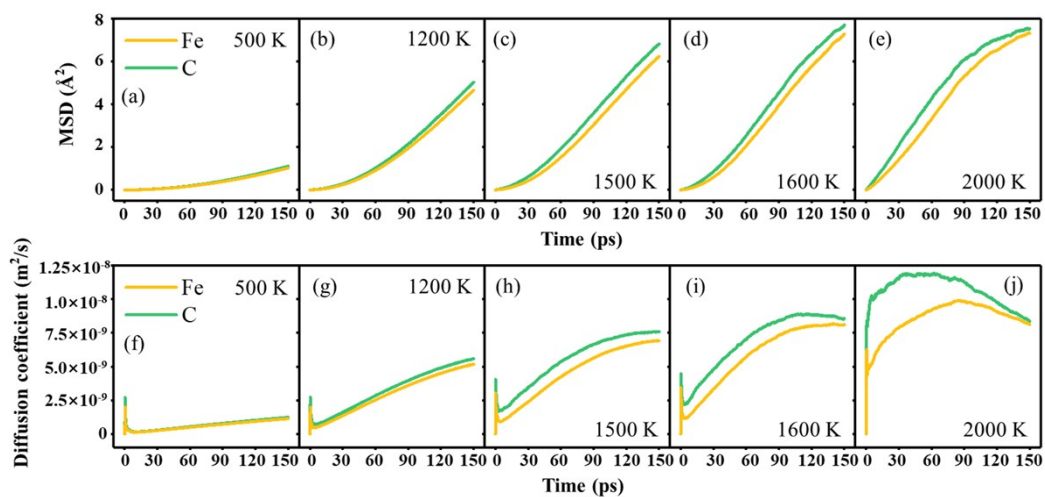

**Fig. S11.** (a)-(e) The mean-square displacements (MSD) and (f)-(j) the diffusion coefficient of Fe and C atoms of  $\text{Fe}_5\text{C}_2$  nanoparticles at different temperatures.

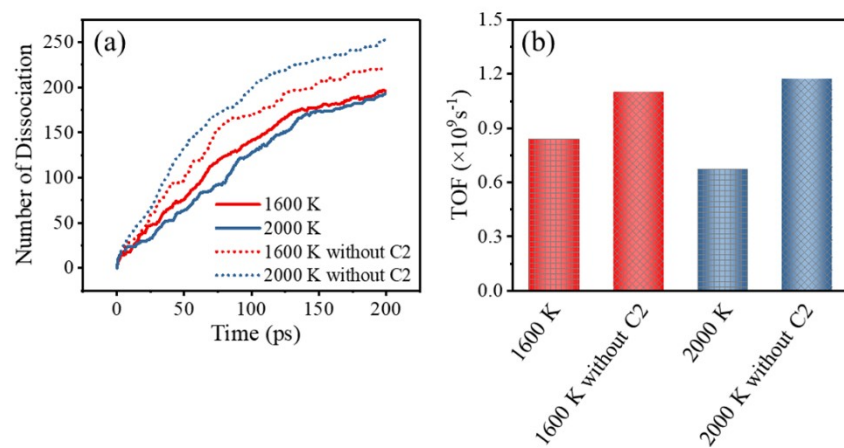

**Fig. S12.** (a) The CO dissociation number and (b) the TOF value of the nanoparticles with/without C2 models.
